# Supplementary material for: Taxonomy, Sequence Variance and Functional Profiling of the Microbial Community of Long-Ripened Cheddar Cheese Using Shotgun Metagenomics
Source: MDPI journal article supplement (doi:10.3390/microorganisms11082052), 2023-08-10
Supplement: s1 [file s1]

Supplementary Material for Mohamed et al. (2023).

**Table S1.** PMA samples sequencing breakdown analysis statistics; showing sequence length, mean GC percent; before and after QC; in addition to sequences containing annotated proteins and predicted rRNA and their percentiles, besides  $\alpha$ -diversity per each sample.

|     |       |    | Before QC                 |             | Post QC                   |             | Number of sequences with predicted proteins (%) | Number with predicted rRNA features (%) | Sequence Passed QC (%) | $\alpha$ -diversity |
|-----|-------|----|---------------------------|-------------|---------------------------|-------------|-------------------------------------------------|-----------------------------------------|------------------------|---------------------|
| Age | Trial | S# | Mean Sequence Length (bp) | Mean GC (%) | Mean Sequence Length (bp) | Mean GC (%) |                                                 |                                         |                        |                     |
| 3   | 1     | 7  | 187 $\pm$ 33              | 45 $\pm$ 5  | 191 $\pm$ 33              | 45 $\pm$ 5  | 2,447,789 (95.61%)                              | 21,168 (0.83%)                          | 76.10                  | 5                   |
| 3   | 1     | 8  | 187 $\pm$ 33              | 45 $\pm$ 6  | 191 $\pm$ 33              | 45 $\pm$ 6  | 2,731,154 (95.46%)                              | 25,525 (0.89%)                          | 74.27                  | 7                   |
| 3   | 1     | 9  | 189 $\pm$ 33              | 45 $\pm$ 6  | 193 $\pm$ 33              | 45 $\pm$ 6  | 2,263,862 (95.06%)                              | 20,867 (0.88%)                          | 78.40                  | 7                   |
| 7   | 1     | 11 | 188 $\pm$ 33              | 45 $\pm$ 6  | 195 $\pm$ 32              | 45 $\pm$ 6  | 3,555,055 (95.64%)                              | 30,365 (0.82%)                          | 65.16                  | 6                   |
| 6   | 2     | 15 | 186 $\pm$ 33              | 42 $\pm$ 6  | 189 $\pm$ 33              | 42 $\pm$ 6  | 2,972,375 (94.13%)                              | 26,508 (0.84%)                          | 81.45                  | 23                  |
| 6   | 2     | 16 | 187 $\pm$ 33              | 39 $\pm$ 6  | 191 $\pm$ 33              | 40 $\pm$ 6  | 2,469,208 (93.98%)                              | 23,489 (0.89%)                          | 75.46                  | 38                  |
| 6   | 2     | 17 | 186 $\pm$ 33              | 43 $\pm$ 7  | 188 $\pm$ 33              | 43 $\pm$ 7  | 2,761,798 (93.03%)                              | 25,052 (0.84%)                          | 86.21                  | 22                  |

**Table S2.** Non-PMA samples sequencing breakdown analysis statistics; showing sequence length, mean GC percent; before and after QC; in addition to sequences containing annotated proteins and predicted rRNA and their percentiles, besides  $\alpha$ -diversity per each sample.

|     |       |    | Before QC                 |             | Post QC                   |             | Number of sequences with predicted proteins (%) | Number with predicted rRNA features (%) | Sequence Passed QC (%) | $\alpha$ -diversity |
|-----|-------|----|---------------------------|-------------|---------------------------|-------------|-------------------------------------------------|-----------------------------------------|------------------------|---------------------|
| Age | Trial | S# | Mean Sequence Length (bp) | Mean GC (%) | Mean Sequence Length (bp) | Mean GC (%) |                                                 |                                         |                        |                     |
| 6   | 5     | 58 | 185 $\pm$ 33              | 40 $\pm$ 7  | 189 $\pm$ 33              | 41 $\pm$ 7  | 2,988,458 (93.82%)                              | 28,855 (0.91%)                          | 75.63                  | 25                  |
| 6   | 5     | 57 | 185 $\pm$ 33              | 40 $\pm$ 7  | 192 $\pm$ 33              | 41 $\pm$ 7  | 6,591,642 (92.94%)                              | 67,007 (0.94%)                          | 63.05                  | 25                  |
| 3   | 5     | 56 | 188 $\pm$ 33              | 36 $\pm$ 6  | 194 $\pm$ 33              | 36 $\pm$ 7  | 2,235,717 (95.61%)                              | 18,361 (0.79%)                          | 58.3                   | 8                   |
| 3   | 5     | 55 | 186 $\pm$ 33              | 35 $\pm$ 6  | 194 $\pm$ 33              | 35 $\pm$ 6  | 2,225,087 (95.91%)                              | 18,818 (0.81%)                          | 57.49                  | 7                   |
| 3   | 5     | 54 | 187 $\pm$ 33              | 39 $\pm$ 8  | 191 $\pm$ 33              | 40 $\pm$ 8  | 2,591,740 (94.58%)                              | 20,631 (0.75%)                          | 71.16                  | 9                   |
| 3   | 5     | 53 | 186 $\pm$ 33              | 36 $\pm$ 7  | 191 $\pm$ 33              | 38 $\pm$ 7  | 2,807,647 (93.25%)                              | 23,464 (0.78%)                          | 62.03                  | 15                  |
| 3   | 5     | 52 | 183 $\pm$ 33              | 37 $\pm$ 7  | 189 $\pm$ 34              | 38 $\pm$ 7  | 2,793,452 (94.41%)                              | 21,624 (0.73%)                          | 60.22                  | 10                  |
| 3   | 5     | 51 | 187 $\pm$ 33              | 35 $\pm$ 6  | 194 $\pm$ 33              | 35 $\pm$ 6  | 2,092,687 (95.93%)                              | 18,901 (0.87%)                          | 58.79                  | 6                   |
| 2   | 5     | 50 | 241 $\pm$ 5               | 33 $\pm$ 7  | 241 $\pm$ 6               | 33 $\pm$ 7  | 32,722 (86.86%)                                 | 426 (1.13%)                             | 50.87                  | 4                   |
| 2   | 5     | 49 | 187 $\pm$ 33              | 35 $\pm$ 6  | 194 $\pm$ 33              | 35 $\pm$ 6  | 2,241,549 (95.86%)                              | 23,970 (1.03%)                          | 61.93                  | 6                   |
| 2   | 5     | 48 | 184 $\pm$ 33              | 35 $\pm$ 6  | 191 $\pm$ 33              | 35 $\pm$ 6  | 2,480,307 (96.19%)                              | 25,459 (0.99%)                          | 58.67                  | 5                   |
| 2   | 5     | 47 | 185 $\pm$ 33              | 35 $\pm$ 6  | 192 $\pm$ 33              | 35 $\pm$ 6  | 2,272,143 (95.83%)                              | 22,704 (0.96%)                          | 58.49                  | 5                   |
| 2   | 5     | 46 | 187 $\pm$ 33              | 35 $\pm$ 6  | 194 $\pm$ 33              | 35 $\pm$ 6  | 2,158,402 (95.93%)                              | 22,327 (0.99%)                          | 58.97                  | 5                   |

|   |   |    |          |        |          |        |                    |                |       |    |
|---|---|----|----------|--------|----------|--------|--------------------|----------------|-------|----|
| 2 | 5 | 45 | 185 ± 33 | 35 ± 6 | 197 ± 33 | 35 ± 6 | 3,636,655 (95.49%) | 36,035 (0.95%) | 43.4  | 5  |
| 2 | 4 | 44 | 185 ± 33 | 35 ± 6 | 192 ± 33 | 35 ± 6 | 2,197,777 (95.53%) | 23,471 (1.02%) | 61.1  | 6  |
| 2 | 4 | 43 | 186 ± 33 | 35 ± 6 | 193 ± 33 | 35 ± 6 | 2,243,083 (95.96%) | 24,402 (1.04%) | 61.11 | 5  |
| 2 | 4 | 42 | 185 ± 33 | 36 ± 6 | 191 ± 33 | 36 ± 6 | 2,361,497 (95.02%) | 25,523 (1.03%) | 64.49 | 9  |
| 2 | 4 | 41 | 186 ± 33 | 36 ± 6 | 191 ± 33 | 36 ± 6 | 2,408,031 (94.94%) | 27,763 (1.09%) | 68.19 | 11 |
| 2 | 4 | 40 | 184 ± 33 | 36 ± 6 | 190 ± 33 | 36 ± 6 | 2,432,981 (95.20%) | 26,182 (1.02%) | 65.57 | 8  |
| 2 | 4 | 39 | 186 ± 33 | 35 ± 6 | 192 ± 33 | 35 ± 6 | 2,184,288 (95.76%) | 22,374 (0.98%) | 60.74 | 5  |
| 5 | 3 | 38 | 184 ± 33 | 36 ± 7 | 191 ± 33 | 37 ± 7 | 2,193,189 (94.99%) | 19,989 (0.87%) | 58.1  | 9  |
| 5 | 3 | 37 | 186 ± 33 | 38 ± 8 | 191 ± 33 | 39 ± 8 | 2,578,281 (94.60%) | 23,454 (0.86%) | 64.44 | 11 |
| 5 | 3 | 36 | 186 ± 33 | 39 ± 9 | 189 ± 33 | 41 ± 9 | 2,740,067 (94.10%) | 28,077 (0.96%) | 72.45 | 20 |
| 3 | 3 | 35 | 183 ± 33 | 35 ± 6 | 189 ± 34 | 35 ± 6 | 2,282,138 (95.99%) | 23,845 (1.00%) | 63.63 | 5  |
| 3 | 3 | 34 | 184 ± 33 | 35 ± 6 | 191 ± 33 | 36 ± 6 | 2,537,754 (95.67%) | 25,629 (0.97%) | 59.53 | 6  |
| 3 | 3 | 33 | 211 ± 27 | 35 ± 6 | 212 ± 27 | 35 ± 6 | 318,268 (94.69%)   | 2,879 (0.86%)  | 90.27 | 5  |
| 3 | 3 | 32 | 185 ± 33 | 36 ± 6 | 192 ± 34 | 36 ± 6 | 2,101,623 (95.38%) | 19,782 (0.90%) | 60.87 | 6  |
| 3 | 3 | 31 | 182 ± 33 | 36 ± 7 | 189 ± 34 | 36 ± 7 | 2,470,194 (94.75%) | 22,805 (0.87%) | 59.94 | 8  |
| 3 | 3 | 30 | 186 ± 33 | 36 ± 7 | 192 ± 33 | 37 ± 7 | 2,221,486 (94.20%) | 20,717 (0.88%) | 62.97 | 10 |
| 2 | 3 | 29 | 210 ± 28 | 35 ± 6 | 212 ± 27 | 35 ± 6 | 255,135 (94.21%)   | 2,279 (0.84%)  | 90.18 | 5  |
| 2 | 3 | 28 | 185 ± 33 | 35 ± 6 | 192 ± 33 | 35 ± 6 | 2,030,342 (96.24%) | 18,866 (0.89%) | 62.17 | 5  |
| 2 | 3 | 27 | 210 ± 28 | 35 ± 6 | 211 ± 28 | 35 ± 6 | 230,121 (93.66%)   | 2,042 (0.83%)  | 91.47 | 6  |
| 2 | 3 | 26 | 210 ± 28 | 35 ± 6 | 212 ± 27 | 35 ± 6 | 314,211 (94.01%)   | 2,824 (0.84%)  | 88.91 | 7  |
| 2 | 3 | 25 | 208 ± 30 | 35 ± 6 | 209 ± 29 | 35 ± 6 | 168,225 (92.67%)   | 1,587 (0.87%)  | 90.72 | 7  |
| 2 | 3 | 24 | 209 ± 29 | 35 ± 6 | 211 ± 28 | 35 ± 6 | 194,301 (92.36%)   | 1,831 (0.87%)  | 90.93 | 8  |
| 1 | 3 | 23 | 207 ± 30 | 35 ± 6 | 209 ± 29 | 35 ± 6 | 159,788 (93.02%)   | 1,484 (0.86%)  | 92.57 | 5  |
| 1 | 3 | 22 | 206 ± 31 | 35 ± 6 | 207 ± 30 | 35 ± 6 | 133,671 (92.47%)   | 1,178 (0.81%)  | 92.83 | 4  |
| 1 | 3 | 21 | 211 ± 28 | 35 ± 6 | 212 ± 27 | 35 ± 6 | 308,800 (94.55%)   | 2,781 (0.85%)  | 90.96 | 4  |
| 1 | 3 | 20 | 208 ± 29 | 35 ± 6 | 210 ± 28 | 35 ± 6 | 236,139 (93.67%)   | 2,099 (0.83%)  | 88.9  | 5  |
| 1 | 3 | 19 | 206 ± 30 | 35 ± 6 | 207 ± 30 | 35 ± 6 | 130,339 (92.35%)   | 1,189 (0.84%)  | 91.57 | 4  |
| 1 | 3 | 18 | 211 ± 27 | 35 ± 6 | 213 ± 26 | 35 ± 6 | 540,999 (95.21%)   | 4,955 (0.87%)  | 85.07 | 5  |
| 6 | 2 | 14 | 185 ± 33 | 40 ± 7 | 187 ± 33 | 41 ± 7 | 3,088,482 (92.50%) | 26,639 (0.80%) | 82.89 | 29 |
| 6 | 2 | 13 | 184 ± 33 | 39 ± 6 | 188 ± 33 | 39 ± 6 | 2,971,855 (93.26%) | 29,014 (0.91%) | 78.77 | 42 |
| 6 | 2 | 12 | 184 ± 33 | 39 ± 7 | 187 ± 33 | 40 ± 7 | 3,012,266 (93.19%) | 25,133 (0.78%) | 81.42 | 30 |
| 7 | 1 | 10 | 186 ± 33 | 42 ± 7 | 188 ± 33 | 42 ± 7 | 2,349,784 (93.06%) | 17,383 (0.69%) | 83.09 | 23 |
| 3 | 1 | 6  | 187 ± 33 | 36 ± 6 | 193 ± 33 | 36 ± 6 | 2,144,401 (95.04%) | 21,981 (0.97%) | 64.3  | 8  |
| 3 | 1 | 5  | 190 ± 33 | 42 ± 8 | 192 ± 33 | 42 ± 7 | 2,265,257 (93.78%) | 21,502 (0.89%) | 80.08 | 10 |
| 3 | 1 | 4  | 186 ± 33 | 38 ± 8 | 190 ± 33 | 39 ± 7 | 2,616,985 (94.76%) | 25,661 (0.93%) | 70.65 | 10 |
| 2 | 1 | 3  | 186 ± 33 | 35 ± 6 | 193 ± 33 | 36 ± 6 | 2,411,369 (95.44%) | 24,834 (0.98%) | 61.14 | 7  |
| 2 | 1 | 2  | 186 ± 33 | 35 ± 6 | 193 ± 33 | 35 ± 6 | 2,156,235 (96.03%) | 23,314 (1.04%) | 61.9  | 4  |
| 2 | 1 | 1  | 186 ± 33 | 35 ± 6 | 193 ± 33 | 35 ± 6 | 2,327,704 (95.97%) | 25,276 (1.04%) | 62.29 | 5  |

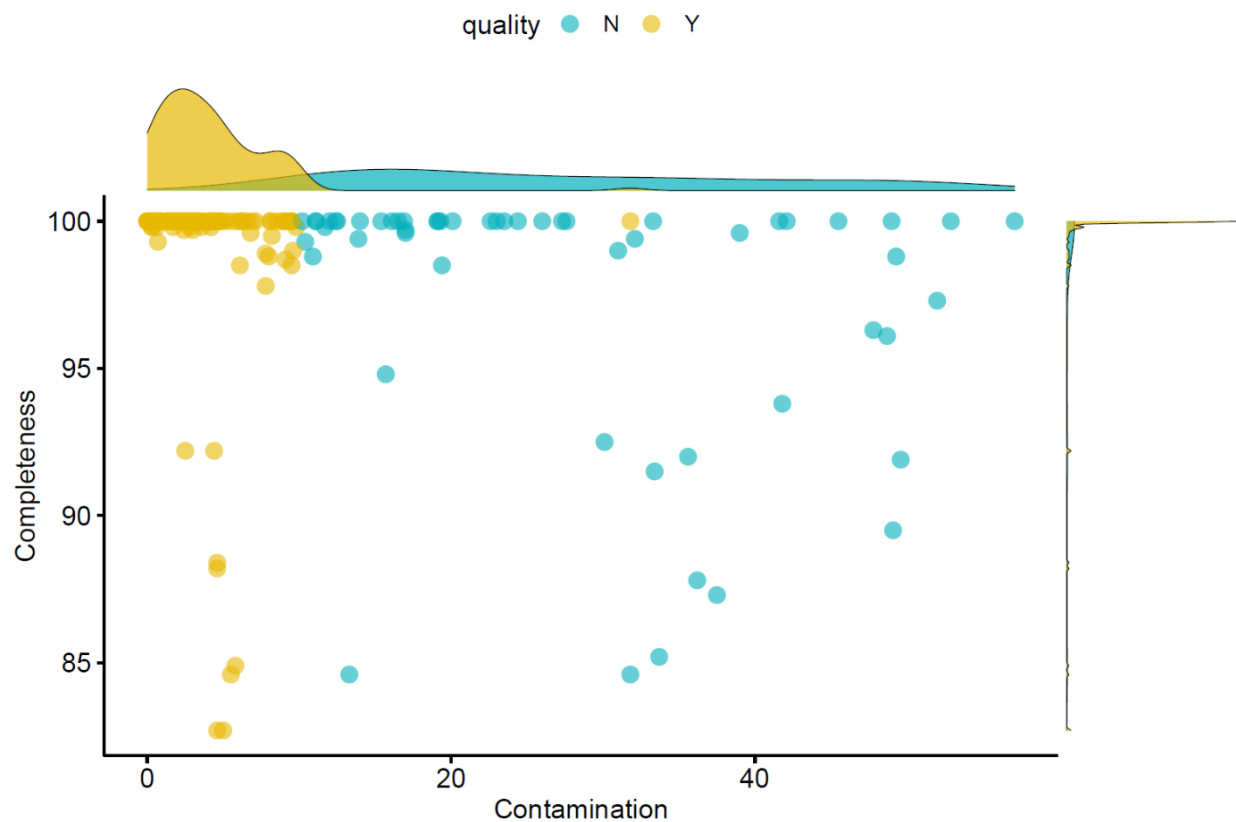

**Figure S1.** Assembly and characterization of cheese MAGs, the quality of MAGs binning as determined by BV-BRC (3.28.21) MAGs binned with good quality (n=110) out of total (n=165) are shown in yellow dots, while MAGs did not pass the quality are with cyan dots. Quality=Y means that these bins met the quality criteria of completeness  $\geq 80\%$ , fine consistency  $\geq 87\%$ , contamination  $\leq 10\%$ , and have a single PheS protein of reasonable size.

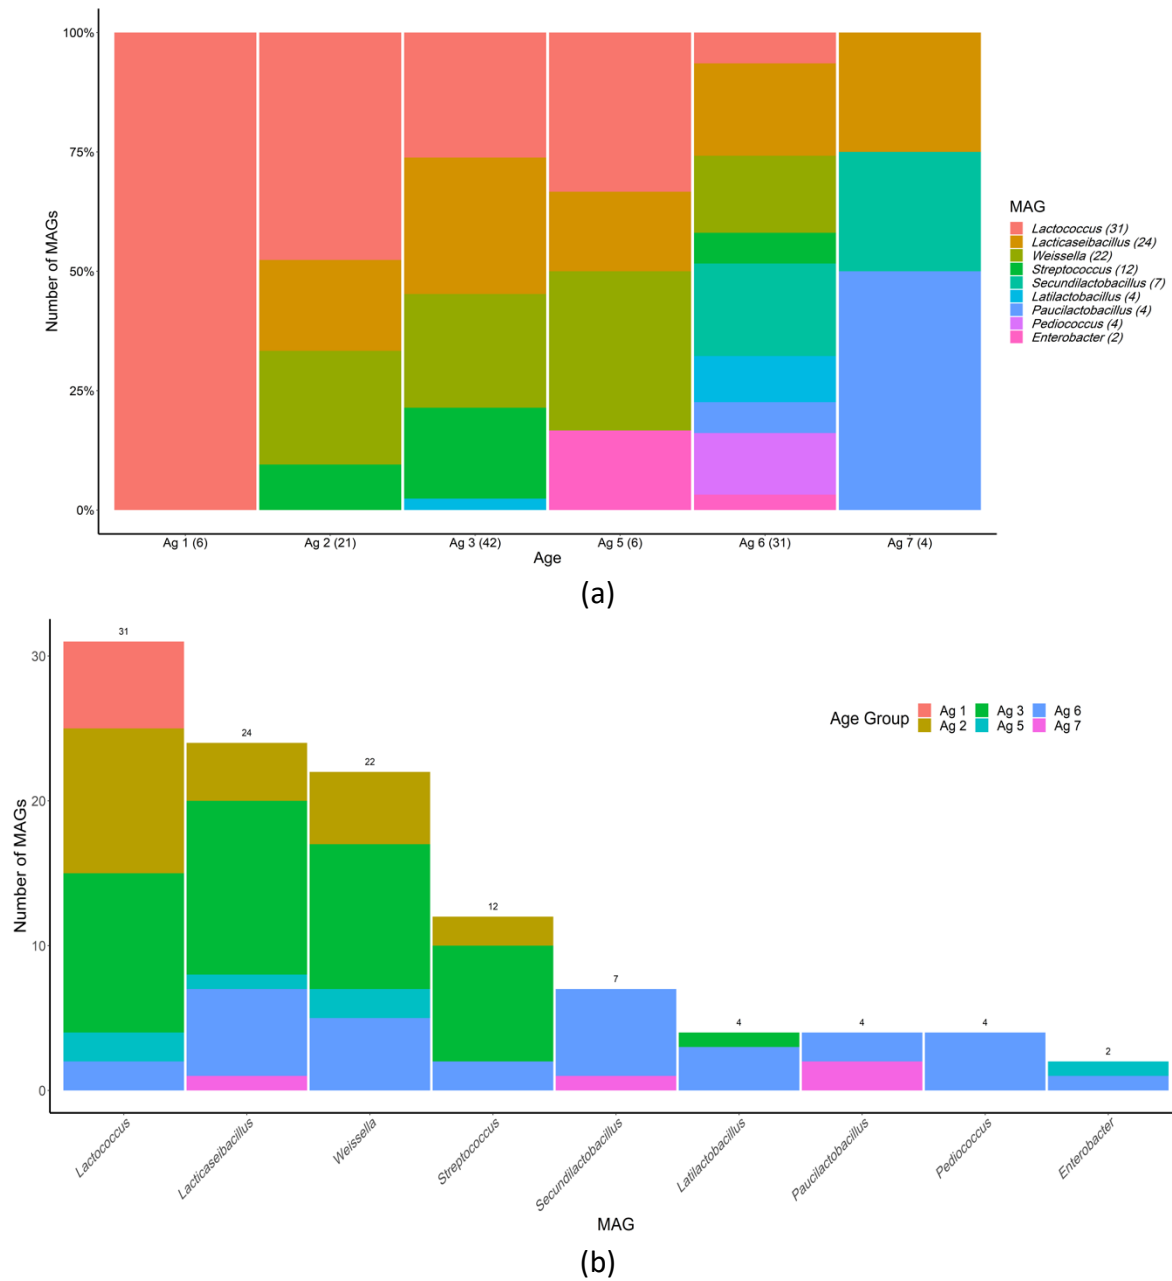

**Figure S2.** Total number of MAGs with good quality detected using metagenomic binning. (a) Distribution of genera where MAGs were assigned across age groups (Y-axis). (b) The genera to which MAGs were assigned are shown on the X-axis for each age group, and the Y-axis shows the total number of good quality MAGs of each genus.

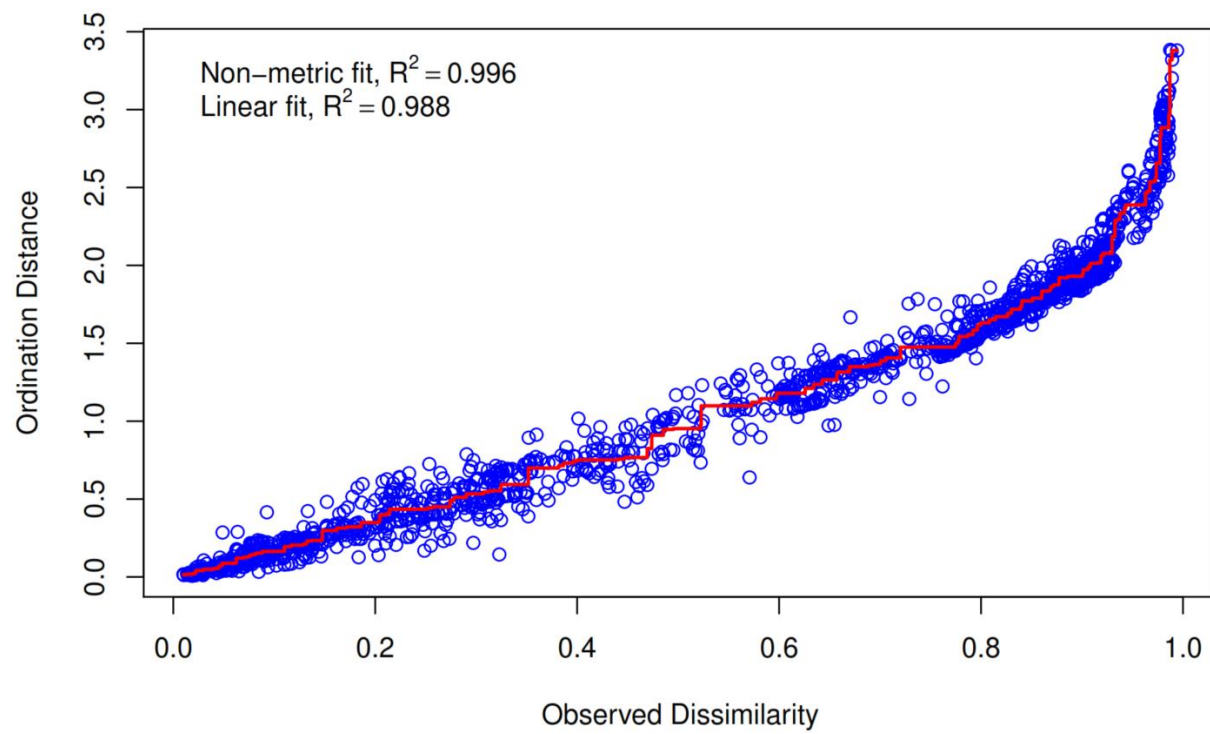

**Figure S3.** Shepard plot of Multivariate nonlinear multidimensional scaling (NMDS) analysis of cheese shotgun samples across all age groups.

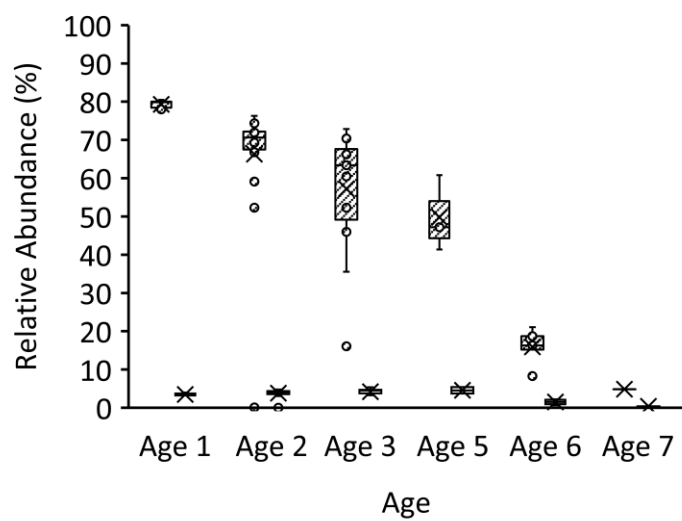

(a)

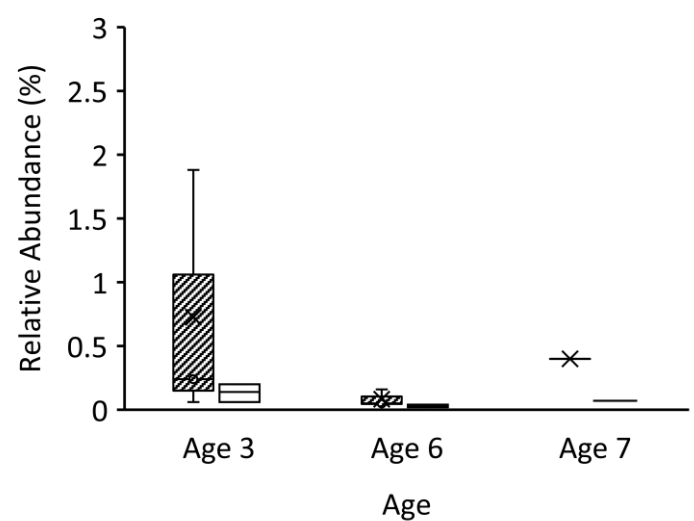

(b)

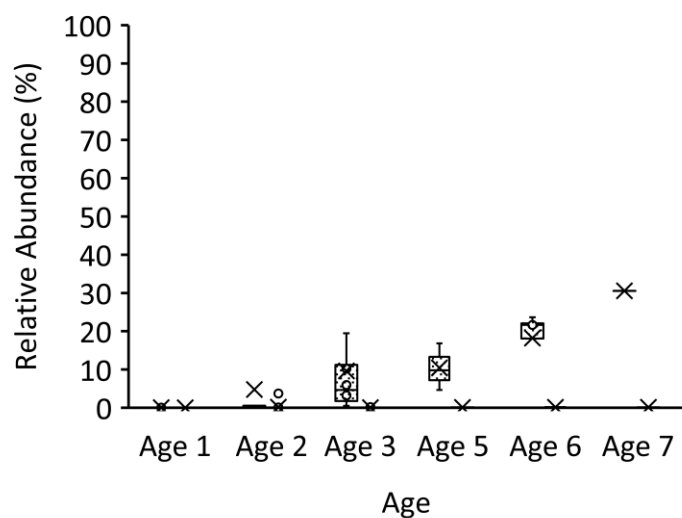

(c)

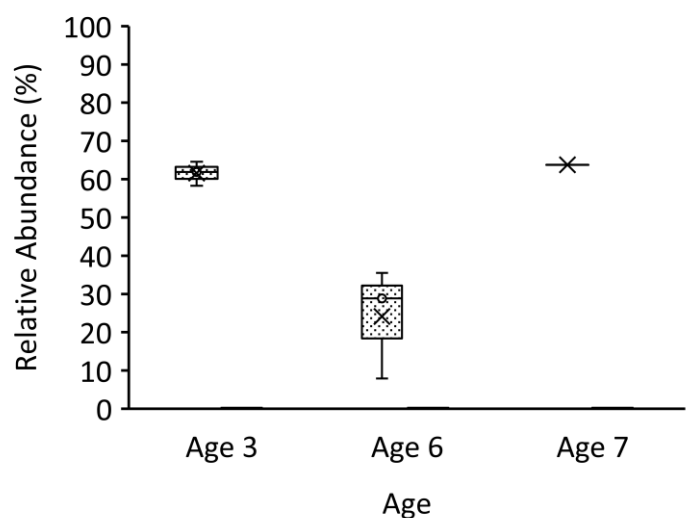

(d)

**Figure S4.** Taxonomic profiling by Kraken2 of *L. cremoris* (stripped box) and *L. lactis* (blank box) population (a,b) and *L. paracasei* (dotted box) and *L. casei* (blank box close to x-axis) population (c,d) in 51 non-PMA treated cheese samples (left) and 7 PMA treated cheese samples (right).

**Table S3.** Relative abundance (%) by Kraken2 of total *Lactococcus lactis*, *L. cremoris*, *L. lactis* and unclassified *Lactococcus lactis* of 51 non-PMA-treated aged cheese samples across age groups.

| Taxonomy                        | Relative Abundance (%) |                   |                   |                  |                  |                  |
|---------------------------------|------------------------|-------------------|-------------------|------------------|------------------|------------------|
|                                 | Age 1<br>(n = 6)       | Age 2<br>(n = 21) | Age 3<br>(n = 15) | Age 5<br>(n = 3) | Age 6<br>(n = 5) | Age 7<br>(n = 1) |
| <i>Lactococcus</i>              | 93.0 ± 1.03            | 81.9 ± 5.51       | 73.7 ± 18.7       | 66.9 ± 13.2      | 21.7 ± 7.12      | 6.4 ± 0.0        |
| <i>L. cremoris</i>              | 79.3 ± 1.20            | 66.3 ± 5.56       | 57.2 ± 15.6       | 49.8 ± 9.98      | 15.9 ± 4.82      | 4.9 ± 0.0        |
| <i>L. lactis</i>                | 3.5 ± 0.29             | 3.82 ± 0.46       | 4.2 ± 0.99        | 4.6 ± 0.83       | 1.5 ± 0.62       | 0.4 ± 0.0        |
| unclassified <i>Lactococcus</i> | 10.3 ± 0.79            | 11.8 ± 1.09       | 12.2 ± 2.71       | 12.6 ± 2.51      | 4.3 ± 1.73       | 1.2 ± 0.0        |

**Table S4.** Relative abundance (%) by Kraken2 of total *Lactocaseibacillus*, *L. paracasei*, *L. casei* and unclassified *Lactocaseibacillus paracasei/casei* of 51 non-PMA-treated aged cheese samples across age groups.

| Taxonomy                                               | Relative Abundance (%) |                   |                   |                  |                  |                  |
|--------------------------------------------------------|------------------------|-------------------|-------------------|------------------|------------------|------------------|
|                                                        | Age 1<br>(n = 6)       | Age 2<br>(n = 21) | Age 3<br>(n = 15) | Age 5<br>(n = 3) | Age 6<br>(n = 5) | Age 7<br>(n = 1) |
| <i>Lactocaseibacillus</i>                              | 0.0 ± 0.0              | 5.9 ± 3.63        | 12.6 ± 16.6       | 13.7 ± 7.99      | 23.9 ± 9.54      | 40.5 ± 0.0       |
| <i>L. paracasei</i>                                    | 0.0 ± 0.0              | 4.8 ± 2.76        | 9.6 ± 12.7        | 10.4 ± 6.12      | 18.2 ± 7.37      | 30.6 ± 0.0       |
| <i>L. casei</i>                                        | 0.0 ± 0.0              | 0.2 ± 0.015       | 0.1 ± 0.06        | 0.1 ± 0.04       | 0.1 ± 0.05       | 0.1 ± 0.0        |
| unclassified <i>Lactocaseibacillus paracasei/casei</i> | 0.0 ± 0.0              | 0.9 ± 0.86        | 2.9 ± 3.87        | 3.2 ± 1.83       | 5.6 ± 2.16       | 9.8 ± 0.0        |

**Table S5.** Relative abundance (%) by Kraken2 of total *Lactococcus lactis*, *L. cremoris*, *L. lactis* and unclassified *Lactococcus lactis* of 51 non-PMA-treated aged cheese samples according to trial.

| Taxonomy                        | Relative Abundance (%) |                    |                     |                    |                     |
|---------------------------------|------------------------|--------------------|---------------------|--------------------|---------------------|
|                                 | Trial 1<br>(n = 7)     | Trial 2<br>(n = 3) | Trial 3<br>(n = 21) | Trial 4<br>(n = 6) | Trial 5<br>(n = 14) |
| <i>Lactococcus</i>              | 62.1 ± 34.8            | 17.6 ± 5.97        | 80.7 ± 20.8         | 82.0 ± 8.41        | 73.1 ± 22.7         |
| <i>L. cremoris</i>              | 50.2 ± 29.0            | 13.3 ± 4.33        | 65.8 ± 18.2         | 65.7 ± 8.44        | 56.6 ± 19.0         |
| <i>L. lactis</i>                | 2.88 ± 1.43            | 1.11 ± 0.42        | 3.83 ± 1.02         | 3.95 ± 0.45        | 4.16 ± 1.07         |
| unclassified <i>Lactococcus</i> | 9.03 ± 4.55            | 3.26 ± 1.28        | 11.1 ± 2.93         | 12.3 ± 0.89        | 12.3 ± 3.04         |

**Table S6.** Relative abundance (%) by Kraken2 of total *Lactocaseibacillus*, *L. paracasei*, *L. casei* and unclassified *Lactocaseibacillus paracasei/casei* of 51 non-PMA-treated aged cheese samples according to trial.

| Taxonomy                                               | Relative Abundance (%) |                    |                     |                    |                     |
|--------------------------------------------------------|------------------------|--------------------|---------------------|--------------------|---------------------|
|                                                        | Trial 1<br>(n = 7)     | Trial 2<br>(n = 3) | Trial 3<br>(n = 21) | Trial 4<br>(n = 6) | Trial 5<br>(n = 14) |
| <i>Lactocaseibacillus</i>                              | 18.9 ± 23.5            | 20.3 ± 11.5        | 7.49 ± 20.1         | 4.64 ± 6.05        | 9.70 ± 13.4         |
| <i>L. paracasei</i>                                    | 14.4 ± 17.9            | 15.2 ± 8.63        | 6.01 ± 16.5         | 3.52 ± 4.59        | 7.47 ± 10.4         |
| <i>L. casei</i>                                        | 0.06 ± 0.06            | 0.11 ± 0.06        | 0.20 ± 0.81         | 0.02 ± 0.03        | 0.06 ± 0.06         |
| unclassified <i>Lactocaseibacillus paracasei/casei</i> | 4.52 ± 5.55            | 4.96 ± 2.80        | 1.28 ± 2.75         | 1.09 ± 1.43        | 2.17 ± 3.01         |

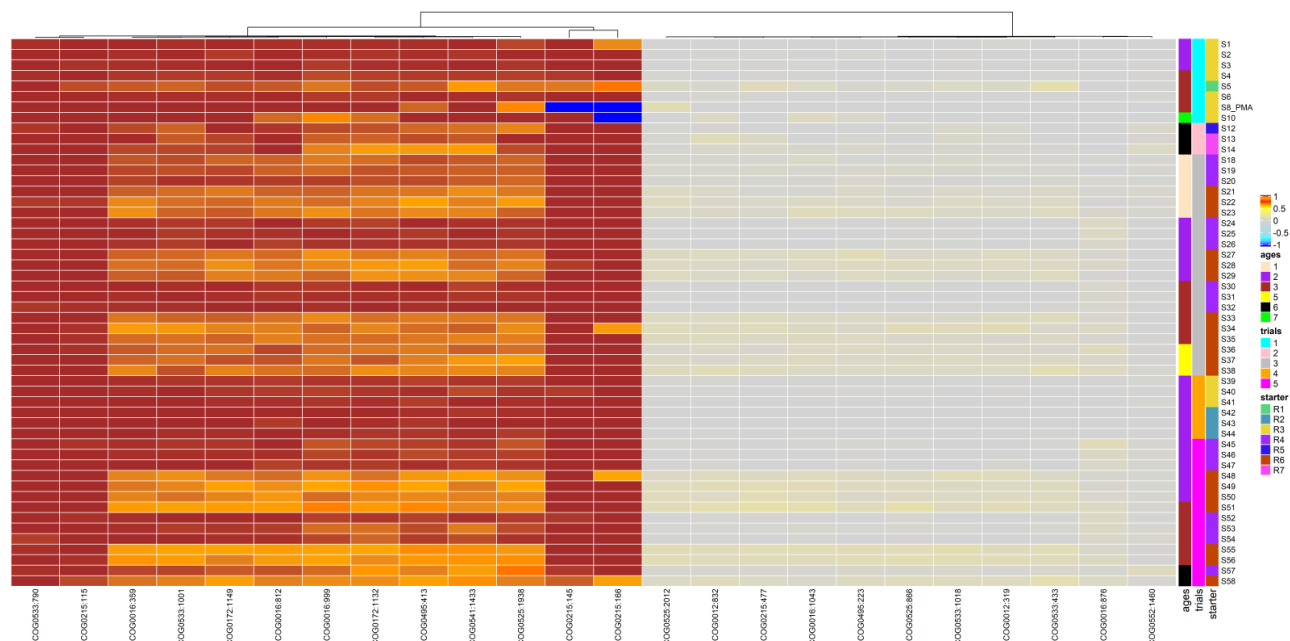

**Figure S5.** SNVs of *Lactococcus cremoris* ordered by trial (i.e., same cheese), each trial had two starters as shown on the right legend.

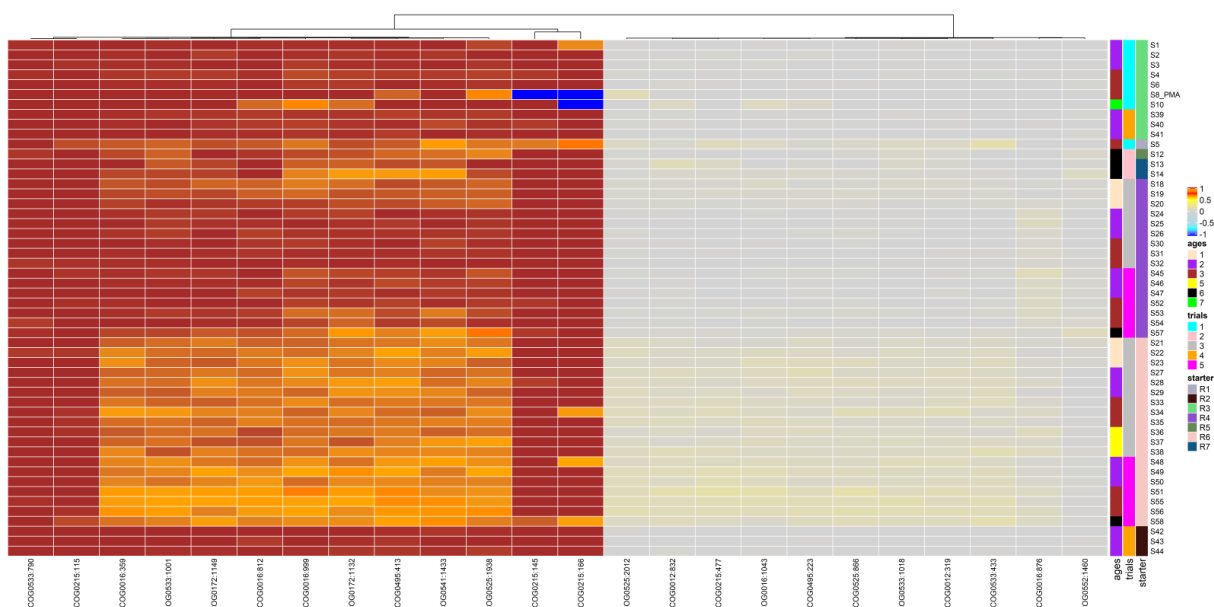

**Figure S6.** Heatmap of the frequencies of *Lactococcus cremoris* SNVs obtained from non-assembled reads ordered by starter, trial number and age of the cheese.



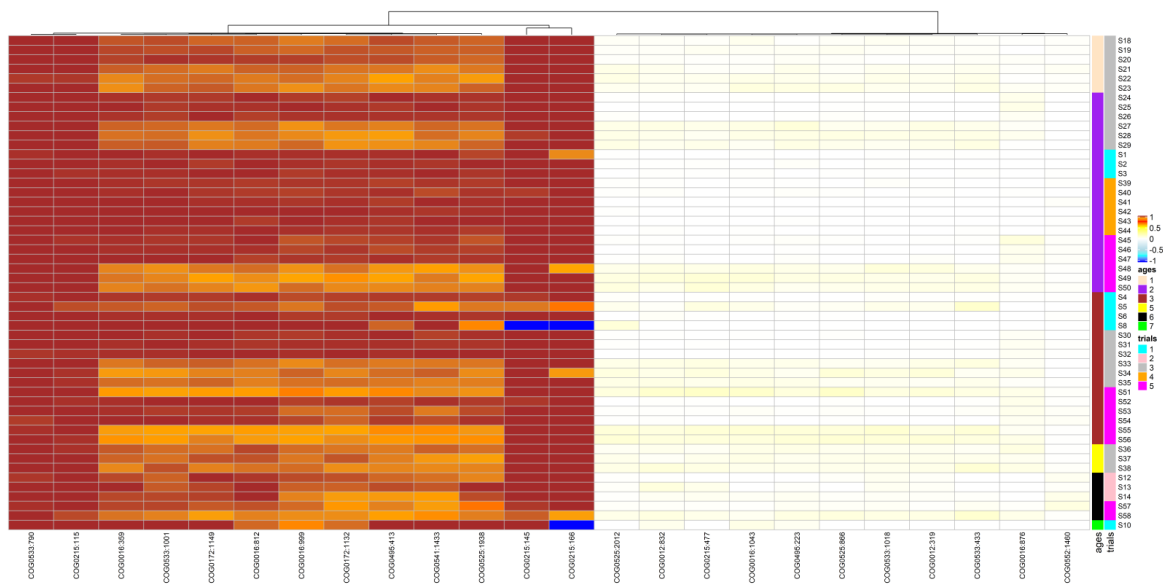

**Figure S7.** Heatmap of the frequencies of *Lactococcus cremoris* SNVs obtained from non-assembled reads ordered first by age of the cheese then by trial number.

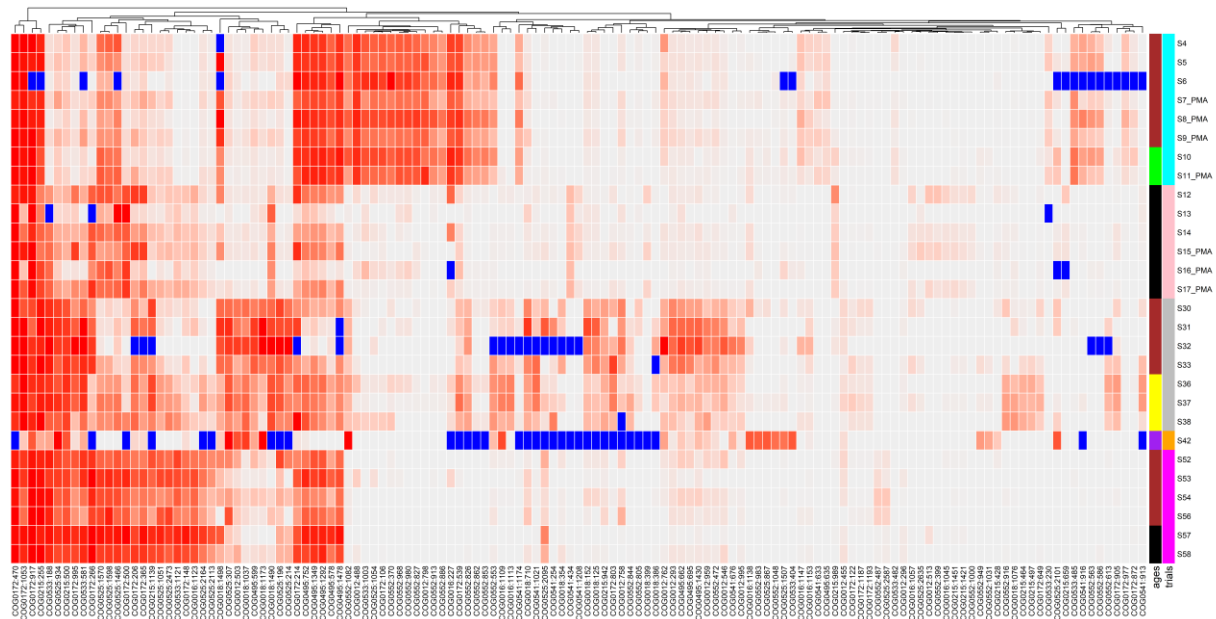

**Figure S8.** Heatmap of the frequency of SNVs of *Lactocaseibacillus paracasei/casei* (73 from *L. paracasei* and 62 from *L. casei*) identified from non-assembled reads ordered first by trial number and then age of cheese.

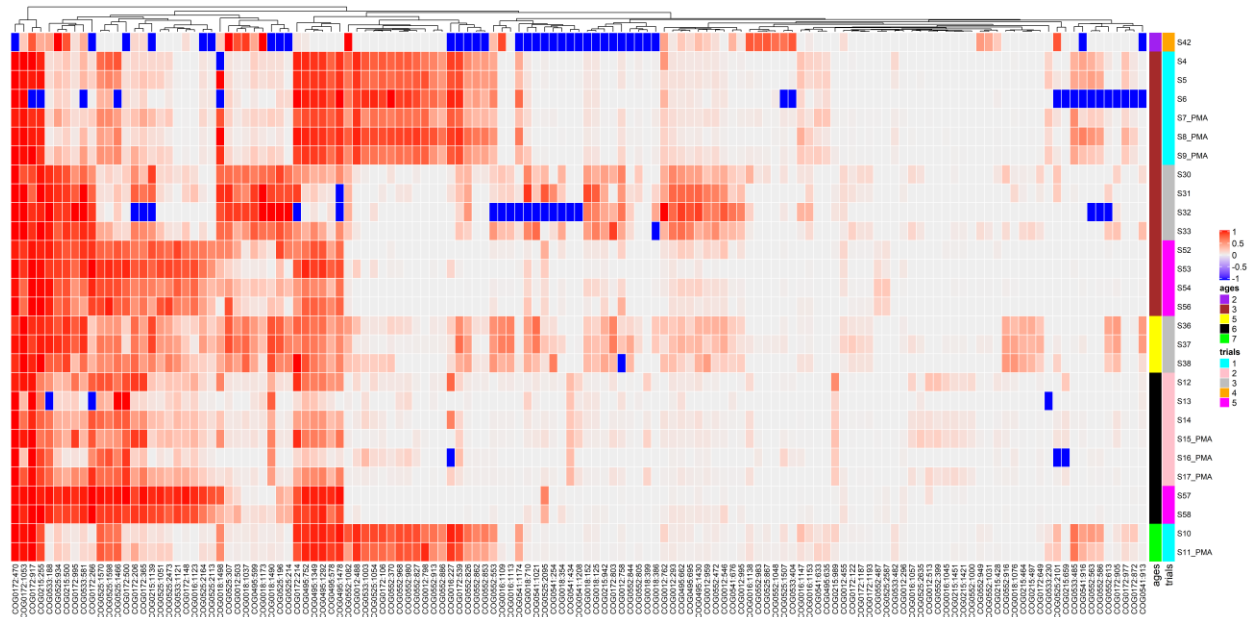

**Figure S9.** Heatmap of the frequency of SNVs of *Lacticaseibacillus paracasei/casei* (73 from *L. paracasei* and 62 from *L. casei*) identified from non-assembled reads ordered first by age and then by trial number.

**Table S7.** Breakdown of SNVs from COG0012 (predicted GTPase) that represent *L. paracasei* or *L. casei*

| SNV         | <i>L. paracasei</i> | <i>L. casei</i> |
|-------------|---------------------|-----------------|
| COG0012:296 | ✓                   |                 |
| COG0012:455 | ✓                   |                 |
| COG0012:488 |                     | ✓               |
| COG0012:503 | ✓                   |                 |
| COG0012:513 | ✓                   |                 |
| COG0012:546 | ✓                   |                 |
| COG0012:758 | ✓                   |                 |
| COG0012:959 | ✓                   |                 |
| COG0012:995 | ✓                   |                 |
| COG0012:762 |                     | ✓               |
| COG0012:798 |                     | ✓               |

**Table S8.** Breakdown of SNVs from COG0016 (Phenylalanyl-tRNA synthetase alpha subunit) that represent *L. paracasei* or *L. casei*

| SNV          | <i>L. paracasei</i> | <i>L. casei</i> |
|--------------|---------------------|-----------------|
| COG0016:1045 | ✓                   |                 |
| COG0016:1057 | ✓                   |                 |
| COG0016:1109 | ✓                   |                 |
| COG0016:1113 | ✓                   |                 |
| COG0016:1123 |                     | ✓               |
| COG0016:1138 |                     | ✓               |
| COG0016:1147 | ✓                   |                 |
| COG0016:1153 | ✓                   |                 |
| COG0016:227  |                     | ✓               |

**Table S9.** Breakdown of SNVs from COG0018 (Arginyl-tRNA synthetase) that represent *L. paracasei* or *L. casei*

| SNV          | <i>L. paracasei</i> | <i>L. casei</i> |
|--------------|---------------------|-----------------|
| COG0018:1498 | ✓                   |                 |
| COG0018:125  |                     | ✓               |
| COG0018:152  |                     | ✓               |
| COG0018:354  |                     | ✓               |
| COG0018:386  |                     | ✓               |
| COG0018:399  |                     | ✓               |
| COG0018:710  |                     | ✓               |
| COG0018:1037 |                     | ✓               |
| COG0018:1076 |                     | ✓               |
| COG0018:1173 |                     | ✓               |
| COG0018:1490 |                     | ✓               |

**Table S10.** Breakdown of SNVs from COG00172 (Seryl-tRNA synthetase) that represent *L. paracasei* or *L. casei*

| SNV          | <i>L. paracasei</i> | <i>L. casei</i> |
|--------------|---------------------|-----------------|
| COG0172:106  | ✓                   |                 |
| COG0172:122  | ✓                   |                 |
| COG0172:148  | ✓                   |                 |
| COG0172:206  |                     | ✓               |
| COG0172:214  | ✓                   |                 |
| COG0172:365  | ✓                   |                 |
| COG0172:649  |                     | ✓               |
| COG0172:995  |                     | ✓               |
| COG0172:1053 | ✓                   |                 |
| COG0172:1187 | ✓                   |                 |
| COG0172:1193 |                     | ✓               |
| COG0172:206  |                     | ✓               |
| COG0172:266  |                     | ✓               |
| COG0172:470  |                     | ✓               |
| COG0172:500  |                     | ✓               |
| COG0172:539  |                     | ✓               |
| COG0172:803  |                     | ✓               |
| COG0172:872  |                     | ✓               |
| COG0172:905  |                     | ✓               |
| COG0172:917  |                     | ✓               |
| COG0172:977  |                     | ✓               |

**Table S11.** Breakdown of SNVs from COG00215 (cysteinyl-tRNA synthetase) that represent *L. paracasei* or *L. casei*

| SNV          | <i>L. paracasei</i> | <i>L. casei</i> |
|--------------|---------------------|-----------------|
| COG0215:428  | ✓                   |                 |
| COG0215:464  | ✓                   |                 |
| COG0215:497  | ✓                   |                 |
| COG0215:500  | ✓                   |                 |
| COG0215:942  | ✓                   |                 |
| COG0215:1139 | ✓                   |                 |
| COG0215:1421 | ✓                   |                 |
| COG0215:1451 |                     | ✓               |
| COG0215:255  |                     | ✓               |
| COG0215:659  |                     | ✓               |
| COG0215:942  |                     | ✓               |
| COG0215:989  |                     | ✓               |

**Table S12.** Breakdown of SNVs from COG00495 (leucyl-tRNA synthetase) that represent *L. paracasei* or *L. casei*

| SNV          | <i>L. paracasei</i> | <i>L. casei</i> |
|--------------|---------------------|-----------------|
| COG0495:578  | ✓                   |                 |
| COG0495:599  | ✓                   |                 |
| COG0495:635  | ✓                   |                 |
| COG0495:662  |                     | ✓               |
| COG0495:695  | ✓                   |                 |
| COG0495:752  | ✓                   |                 |
| COG0495:1292 | ✓                   |                 |
| COG0495:1349 | ✓                   |                 |
| COG0495:1430 | ✓                   |                 |
| COG0495:1478 | ✓                   |                 |

**Table S13.** Breakdown of SNVs from COG0525 (valyl-tRNA synthetase) that represent *L. paracasei* or *L. casei*

| SNV          | <i>L. paracasei</i> | <i>L. casei</i> |
|--------------|---------------------|-----------------|
| COG0525:196  | ✓                   |                 |
| COG0525:214  | ✓                   |                 |
| COG0525:307  | ✓                   |                 |
| COG0525:867  | ✓                   |                 |
| COG0525:934  | ✓                   |                 |
| COG0525:1051 | ✓                   |                 |
| COG0525:1054 |                     | ✓               |
| COG0525:2095 | ✓                   |                 |
| COG0525:2113 | ✓                   |                 |
| COG0525:2164 | ✓                   |                 |
| COG0525:2473 | ✓                   |                 |
| COG0525:2587 | ✓                   |                 |
| COG0525:2635 | ✓                   |                 |
| COG0525:1466 |                     | ✓               |
| COG0525:1507 |                     | ✓               |
| COG0525:1570 |                     | ✓               |
| COG0525:1598 |                     | ✓               |
| COG0525:2101 |                     | ✓               |
| COG0525:2113 |                     | ✓               |

**Table S14.** Breakdown of SNVs from COG0533 (metal dependent protease) that represent *L. paracasei* or *L. casei*

| SNV          | <i>L. paracasei</i> | <i>L. casei</i> |
|--------------|---------------------|-----------------|
| COG0533:404  | ✓                   |                 |
| COG0533:482  | ✓                   |                 |
| COG0533:485  | ✓                   |                 |
| COG0533:581  | ✓                   |                 |
| COG0533:188  |                     | ✓               |
| COG0533:230  |                     | ✓               |
| COG0533:1003 |                     | ✓               |
| COG0533:1121 |                     | ✓               |

**Table S15.** Breakdown of SNVs from COG0541 (signal recognition particle GTPase Ffh) that represent *L. paracasei* or *L. casei*

| SNV          | <i>L. paracasei</i> | <i>L. casei</i> |
|--------------|---------------------|-----------------|
| COG0541:254  | ✓                   |                 |
| COG0541:434  | ✓                   |                 |
| COG0541:633  |                     | ✓               |
| COG0541:676  | ✓                   |                 |
| COG0541:913  | ✓                   |                 |
| COG0541:916  | ✓                   |                 |
| COG0541:1021 |                     | ✓               |
| COG0541:1174 | ✓                   |                 |
| COG0541:1208 | ✓                   |                 |

**Table S16.** Breakdown of SNVs from COG0552 (signal recognition particle GTPase FtsY) that represent *L. paracasei* or *L. casei*

| SNV          | <i>L. paracasei</i> | <i>L. casei</i> |
|--------------|---------------------|-----------------|
| COG0552:370  | ✓                   |                 |
| COG0552:399  | ✓                   |                 |
| COG0552:472  | ✓                   |                 |
| COG0552:487  |                     | ✓               |
| COG0552:553  | ✓                   |                 |
| COG0552:563  | ✓                   |                 |
| COG0552:586  | ✓                   |                 |
| COG0552:613  | ✓                   |                 |
| COG0552:805  |                     | ✓               |
| COG0552:826  | ✓                   |                 |
| COG0552:844  | ✓                   |                 |
| COG0552:853  | ✓                   |                 |
| COG0552:862  | ✓                   |                 |
| COG0552:886  | ✓                   |                 |
| COG0552:913  | ✓                   |                 |
| COG0552:949  | ✓                   |                 |
| COG0552:1031 | ✓                   |                 |
| COG0552:1048 |                     | ✓               |
| COG0552:1082 |                     | ✓               |
| COG0552:827  |                     | ✓               |
| COG0552:916  |                     | ✓               |
| COG0552:968  |                     | ✓               |
| COG0552:980  |                     | ✓               |
| COG0552:983  |                     | ✓               |
| COG0552:1000 |                     | ✓               |

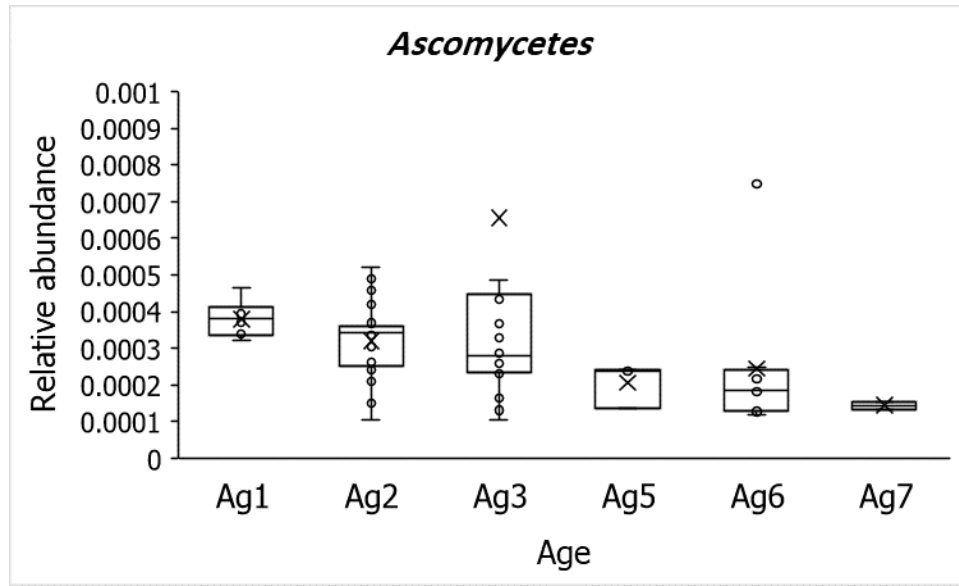

(a)

**Figure S10.** *Ascomycota* taxa profiling using the non-assembly-based MG-RAST approach.
